# Supplementary material
Source: ML conference proceedings conference paper supplement (https://openreview.net/forum?id=2TOcJivjpt)
Supplement: supplementary_material [file attachment]

# POOR TEACHING: EXPLORE AND QUESTION KNOWLEDGE DISTILLATION UNDER DISTRIBUTION SHIFT

**Anonymous authors**

Paper under double-blind review

## ABSTRACT

Knowledge distillation techniques transfer knowledge from a complex or large learning model into a small model, and have made remarkable achievements in recent decades. However, few studies have investigated and explored the mechanism of the knowledge distillation against distribution shifts in real scenarios. In this paper, we reconsider the knowledge distillation paradigm under the shift situations, by reformulating the objectives of distillation with multiple domains. Under the novel paradigm, we propose a unified and systematic evaluation framework to benchmark knowledge distillation against two general distributional shifts including diversity and correlation shift. The evaluation benchmark covers more than 20 methods from algorithmic, data-driven, and optimization perspectives for five benchmark datasets. Extensive experiments are constructed and some constructive findings are summarized to explain when and how the existing knowledge distillation methods work against distribution shifts.

## 1 INTRODUCTION

Knowledge Distillation (KD) is widely used to transfer knowledge from large model to small model (Gou et al., 2021), with the underlying independent and identically distribution (*i.i.d.*) assumption. However, the efficacy of KD can be limited by distribution shift (non-*i.i.d.* case). Distribution shift refers to a situation where the data distribution during inference differs significantly from that during training (Wiles et al., 2021; Yang et al., 2023). This may lead to a drop in the performance of student model after distillation. For example, while a lightweight student learns to identify dogs or colored digits with the help of the large model, it may not generalize well to real-world samples that it has not seen before, such as cartoon-style dogs or color-reversed digits (Fig. 1). Such shift leads to a trade-off between model capacity and generalization performance on student model (Wang et al., 2021).

As widely applied as KD is, many efforts investigate the mechanics of how knowledge distillation works, and the generalization ability existed in teacher and student model under *i.i.d.* assumption (Allen-Zhu & Li, 2020; Stanton et al., 2021; Hao et al., 2023). However, few have been known or evaluated about when and how well the student model learns from the teacher against distribution shift. This naturally prompts the following research questions:

**Our empirical questions:**

*Do existing methods designed for knowledge distillation still work when evaluated under distribution shift? –Especially how well does student models match their teachers across different types of knowledge against distribution shift? What are the optimal data strategies, such as augmentation or pruning, to address distribution shift? Finally, what are the better optimization options in this context?*

To answer those questions, we propose a knowledge distillation paradigm under distributional shift situations. This novel paradigm involves rethinking the previous knowledge distillation settings and reformulating the objectives to accommodate multiple domains in real-world scenarios. On behalf of this new paradigm, we identify and reconsider the potentially influential factors from three different perspectives: algorithm-level, data-level, and optimization-level. We also specify two

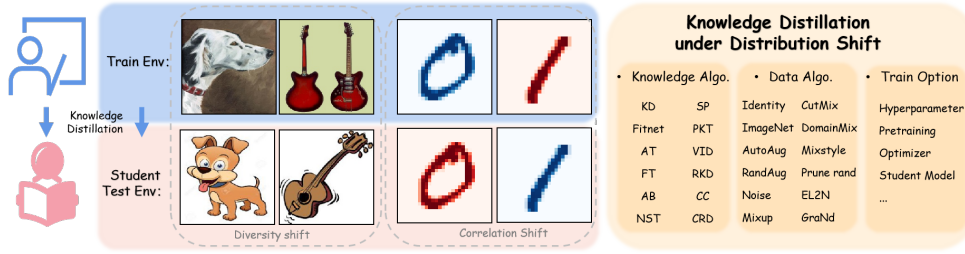

Figure 1: (Left) Knowledge distillation tends to exhibit overfitting to distribution shift in real-world applications. Distribution changes are typically categorised as diversity and correlation shift according to the changes in  $P(X)$  and  $P(Y|X)$ , respectively, such as style-changed pictures or color-reversed digits. (Right) We propose a unified framework to evaluate knowledge distillation under distribution shift and compare its effectiveness against more than 20 algorithms. The perspective of various algorithms mainly from three level, including algorithm, data, and optimization.

types of distribution shifts with respect to the characteristics of domain data, as previously described by Ye et al. (2022). Furthermore, we propose a comprehensive and systematic evaluation framework to benchmark the effectiveness of knowledge distillation under distributional shift scenarios. The evaluation benchmark covers a wide spectrum of knowledge distillation approaches (more than 20) categorized, consisting of knowledge types, distillation data manipulation, and optimization options.

We conduct extensive experiments in our benchmark, and show that this framework analyzes knowledge distillation performance in various real-world settings, which is truly crucial. It can provide insight into different ways and enhance KD interpretability and stability by regulating the negativity. Besides, our framework is easily extendable and brings new dimensions to the recent emerging areas (e.g., knowledge transfer from foundation models to small models in specific domains). We finally summarize some constructive meta recommendations as takeaways to benefit the research community. Specifically, the main contributions are summarized as follows:

- We formulate a novel knowledge distillation framework evaluated under distribution shift by rethinking previous settings. Our framework considers influential factors and offers a comprehensive insight for tackling such problem.
- We construct a thorough and systematic evaluation benchmark for knowledge distillation under distributional shift situations, which spans a wide spectrum of approaches with more than 20 algorithms. We believe that this is the first work to evaluate the performance of various distillation methods on shifted distribution.
- Based on extensive experiments on our benchmark, we have some constructive findings to explain when and how the existing knowledge distillation methods work against distribution shift. Few knowledge distillation methods can work against all shift conditions, and vanilla knowledge distillation method is enough in some cases. Data manipulation and pre-training can be effective mechanisms to improve the robustness of the student model against distribution shifts.

## 2 FRAMEWORK TO EVALUATE DISTILLATION TO DISTRIBUTION SHIFT

### 2.1 PRELIMINARIES

**Knowledge Distillation (KD).** Hinton et al. (2015) first proposed KD to transfer knowledge from elaborate complex network to a shallower one. Under the supervised classification setting, given a large-scale teacher model  $T = T(x; \theta_t)$  optimized on training data  $D = \{(x, y) | x \in \mathcal{X}, y \in \mathcal{Y}\}$ , where  $\mathcal{X}$  and  $\mathcal{Y}$  denotes the input and output space, respectively. The lightweight student model  $S = S(x; \theta_s)$  directly minimizes the following objective:

$$\min_{\theta_s} \mathbb{E}[\alpha \ell_{KL}(S, T) + (1 - \alpha) \ell_{CE}(S, y)] \quad (1)$$

where the distillation weight  $\alpha \in [0, 1]$ .  $\ell_{KL}$  is the transfer loss term that encourages  $S$  to imitate the predictive distribution of  $T$ , and  $\ell_{CE}$  is the cross-entropy between student outputs and ground-

truth labels. In general, equation 1 works under the *i.i.d.* assumption which does not hold in real scenarios, as Fig 1. In the case of  $P_{tr}(x, y) \neq P_{te}(x, y)$ , the student model might encounter failure, eventually not being applicable.

**KD under distribution shift (non-*i.i.d.* case).** In the context of non-*i.i.d.* case, we are given  $K$  similar but distinct training domains  $D_{tr} = \{D^e = (x^e, y^e)\}_{e=1}^K$ , each are sampled from the joint distribution  $P_{\mathcal{X} \times \mathcal{Y}}^e$ . Noted that  $P_{\mathcal{X} \times \mathcal{Y}}^e \neq P_{\mathcal{X} \times \mathcal{Y}}^{e'}$ ,  $e \neq e'$  and  $e, e' \in \{1, \dots, K\}$ . The goal of KD under distribution shift is to construct a student model  $S(x; \theta_s)$  which can perform well on unseen environment  $D_{te}$ . That is,  $D_{te}$  is not accessible in training and  $P_{\mathcal{X} \times \mathcal{Y}}^{tr} \neq P_{\mathcal{X} \times \mathcal{Y}}^{te}$ . The objective function can be reformulate as:

$$\min_{\theta_s} \mathbb{E}_{(x,y) \in P_{\mathcal{X} \times \mathcal{Y}}^{te}} [\alpha \ell_{KL}(S, T) + (1 - \alpha) \ell_{CE}(S, y)] \quad (2)$$

We focus on offline distillation here, which involves the transfer from a pre-trained teacher model to a student. In theory, we expect the student model can generalize to different distributions that are invisible shifts. However, in practice, the trade-off between handling shifts and model capacity limits the student model. Motivated by this gap between theory and reality, the research question is prompt: *There are many existing methods designed for knowledge distillation, do they still work under distribution shift?* To investigate the question, we propose a evaluation framework of KD against distribution shift. As a whole, our framework try to provide novel insights for previous KD and enhance its interpretability and stability.

## 2.2 DISTILLATION FRAMEWORK UNDER DISTRIBUTION SHIFT

In the proposed evaluation framework, we investigate the effects of distribution shift on distillation process, delving into distinct and complementary viewpoints in real cases, respectively KD algorithms (*algorithm-level*), data manipulation mechanisms (*data-level*), and optimization selection (*optimization-level*). Furthermore, we introduce the precise settings of three specific circumstances that arise under distribution shifts.

**Transferable Knowledge algorithms.** Current KD algorithms can be classified based on the types of transferred knowledge (Gou et al., 2021). While considering the different knowledge used in diverse algorithms, one can reformulate the goal as:

$$\min_{\theta_s} \mathbb{E}_{(x,y) \in P_{\mathcal{X} \times \mathcal{Y}}^{te}} [\alpha \ell_{KL}(S, T) + (1 - \alpha) \ell_{CE}(S, y) + \beta \ell_{reg}] \quad (3)$$

where  $\ell_{reg}$  denotes different knowledge sources adopted as the regularization terms of KD and  $\beta$  is the trade-off hyperparameter. Based on equation 3, our aim is to explore the trends and reasons for the impact of different knowledge types under distribution shift. Specifically, we seek to answer the question: *What kinds of knowledge can help the student match the teacher model well against distribution shift?*

Thus, we analyze KD algorithms by categorizing them into three distinct categories, as proposed by Gou et al. (2021). **(1) Logit-based knowledge**, which is most popular and imitates the teacher’s fully connected layer directly (*vanilla* KD, Hinton et al. (2015)). **(2) Feature-based knowledge**, which refers to student works with specific intermediate layers in its teacher. The different concerns to the hint layers affect feature selection during transferring, such as attention (AT, Zagoruyko & Komodakis (2016)) or neuron (NST, Huang & Wang (2017)). **(3) Relation-based knowledge**, which leverages the relevance of model layers or samples as learned information to guide student’s learning, such as contrastive learning (CRD, Tian et al. (2019)) or similarity matrix (SP, Tung & Mori (2019)). Knowledge of the relevance is informative and can be shared to guide learning.

**Distillation Data Manipulation.** The impact of distribution shift is not solely determined by distillation algorithms but also significantly influenced by differences in data. In real-world scenarios, the teacher model trained on insufficient or inadequate data is often imperfect, and the performance of the student model is highly dependent on access to a large and high-quality training dataset. However, in the presence of distribution shift, acquiring such a dataset becomes an insurmountable challenge. It is natural to ask *how do we choose a proper data strategy to ensure the robustness of distillation to distribution shift?* For the situation of data manipulation-based KD, We reformulate the learning objective as:

$$\min_{\theta_s} \mathbb{E}_{(x,y) \in P_{\mathcal{X} \times \mathcal{Y}}^{te}} [\alpha \ell_{KL}(S, T) + (1 - \alpha) \ell_{CE}(S^e, y)], (\hat{x}, y) \in P_{\mathcal{X} \times \mathcal{Y}}^{tr} \quad (4)$$

By changing the input  $x$  to  $\hat{x}$  with manipulation function  $M(\cdot)$ , this technique can assist students in better learning.

In our framework, we study two manipulation mechanisms of distillation data, including *data augmentation* and *data pruning*: (1) If distillation data is the main cause of poor teaching performance, **data augmentation**, which is a simple and effective way to improve the coverage of data distribution and inter-domain robustness, *i.e.*,  $M(x) = \hat{x}$  and  $(\hat{x}, y) \in P_{\mathcal{X} \times \mathcal{Y}}^{tr}$ . We pay more attention to the augmentation approach based on randomization or generation. Random-based augmentation is typically achieved by creating new complex environments based on randomized manipulation (*e.g.*, AutoAugment (Cubuk et al., 2018), RandAugment (Cubuk et al., 2020)). Additionally, generation-based augmentation concerns the creation of more diverse data at the feature level (*e.g.*, Mixup (Zhang et al., 2017)). (2) What if there was no augmentation, and the student was distilled from important or representative samples? **Data pruning** (Sorscher et al., 2022), which is the approach to quantifying individual sample differences by removing low-quality or immaterial samples in the dataset, *i.e.*,  $M(D_{tr}) = \{\hat{D}_{tr} = (\hat{x}, y)\}$  and  $(\hat{x}, y) \in P_{\mathcal{X} \times \mathcal{Y}}^{tr}$ . We expect to improve the training efficiency and robustness to distributional shift by improving the quality of distillation data.

**Optimization option.** Prior studies have shown that different optimization settings can lead to varying performance on student models in KD (Stanton et al., 2021). It is worth noting that our framework for distribution shift differs from previous studies due to the lack of access to the unknown test environment. The learning process of KD involves several factors that inherently affect the training process, such as hyperparameter selection and the teacher-student architecture. To gain a better understanding of the influence of such factors, we conduct empirical observations with all other variables held constant.

**Types of Distribution shift.** To better study the performance of KD under distributional shift, we propose to characterize how features change in the downstream domain. Inspired by the real world, Ye et al. (2022) formalize the distribution shift into two types of  $P^e(X)$  and  $P^e(Y|X)$ , namely *diversity shift* and *correlation shift*. The nontrivial shifts lead to large differences across environments, rendering KD vulnerable to overfitting with different poor teaching.

**Diversity shift** describes the fact that each environment in the dataset represents a diversity of characteristics in domains. For example, learning the images from the domain of art painting, but testing on the cartoon-style samples (such as Fig 1 *Left*). **Correlation shift** is caused by spurious correlations in the data that have received more recent attention. For example, the MNIST variant, CMNIST (Arjovsky et al., 2019), consists of the digits with red or green, but flipping the strong correlation of colors and labels in different environments (such as Fig 1 *Right*). This thus creates correlation shift that confuses the student. Detailed quantification and examples can be found in Appendix C. By studying these areas, we can better understand poor performance and learn how to deal with it. Further details of the approach will be provided below.

### 3 BENCHMARKING DISTILLATION FRAMEWORK

We present a evaluation framework aimed at explore the various KD methods in response to distributional changes. Our framework involves proposing an benchmark and assessing over 20 algorithms that span a wide spectrum of approaches, including algorithmic, data-based, and optimization-based techniques. Furthermore, we include the classical benchmark datasets from various domains across distribution shifts. We believe that our study provides the first systematic evaluation on the effectiveness of various distillation techniques for distribution shift. Specifically, the distillation benchmark is explored by covering the following areas:

**Knowledge Transfer Algorithms.** We first focus on the KD algorithm, and introduce the following transfer methods in the benchmark, which we categorize into three distinct aspects. (1) *Logit-based knowledge*: Knowledge Distillation (**KD**) (Hinton et al., 2015). (2) *Feature-based knowledge*: **Fit-net** (Romero et al., 2014), Attention Transfer (**AT**) (Zagoruyko & Komodakis, 2016), Factor Transfer (**FT**) (Kim et al., 2018), Activation Boundaries (**AB**) (Heo et al., 2019), Neuron Selectivity Transfer (**NST**) (Huang & Wang, 2017). (3) *Relation-based knowledge*: Similarity-Preserving (**SP**) (Tung & Mori, 2019), Probabilistic Knowledge Transfer (**PKT**) (Passalis & Tefas, 2018), Variational Information Distillation (**VID**) (Ahn et al., 2019), Relation Knowledge Distillation (**RKD**) (Park et al., 2019), Correlation Congruence (**CC**) (Peng et al., 2019a), Contrastive Representation Distillation

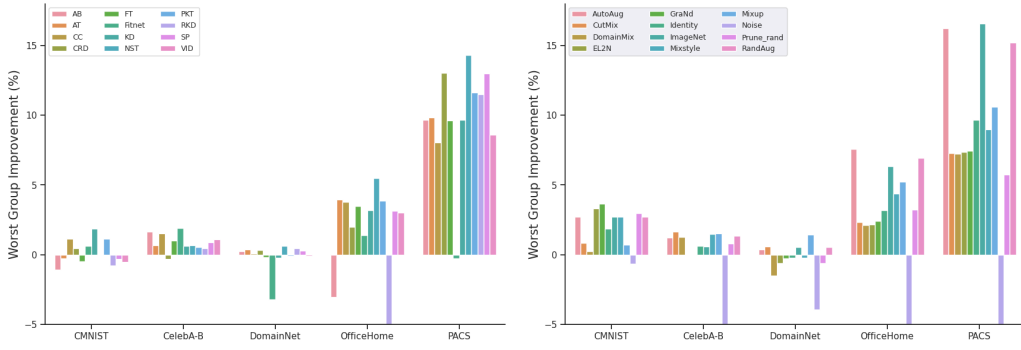

Figure 2: Worst-group improvements over ERM on different shifted datasets. *Left*: data manipulation algorithms; *Right*: Knowledge Transfer algorithms. Different algorithms can achieve enhancement only on certain shift types.

(CRD) (Tian et al., 2019). For further details and comprehensive descriptions of the algorithms used, please refer to Appendix D.2.

**Data Manipulation Techniques.** The unseen distribution encourages us to choose suitable manipulation techniques to increase the data quality and diversity. The manipulation algorithms in our benchmark contain the following areas of specific interest: (1) *vanilla*: **Identity**. (2) *Data Augmentation*: a) *Random-based Augmentation*: **ImageNet baseline**, **AutoAugment** (Cubuk et al., 2018), **RandAugment** (Cubuk et al., 2020), **Gaussian noise**, b) *Generation-based Augmentation*: **Mixup** (Zhang et al., 2017), **CutMix** (Yun et al., 2019), **DomainMix** (Wang et al., 2020), **MixStyle** (Zhou et al., 2021). (3) *Data Pruning*: **Random Prune**, **EL2N** (Paul et al., 2021), **GraNd** (Paul et al., 2021). For further details and comprehensive descriptions of the data techniques used, please refer to Appendix D.1.

**Optimization Option.** We also investigate the effectiveness of various optimization options on KD process in addressing distribution shift. Concretely, we examine a range of optimization options, which include (1) **Distillation hyperparameters**. We perform sweep for hyperparameters and set for all, which ensures fair comparisons in different settings. (2) **Pretrain or not**. Students pretraining on ImageNet is a prevalent out-of-the-box solution, which provide more relevant and diverse features for the target domains, and thus improve the performance. In our benchmark, we add the pre-training option, and observe whether is useful. (3) **Optimizer**. We allow two common optimizers Adam (Kingma & Ba, 2014) and SGD (Bottou, 2012) in our evaluation, and study the potential shift effects of different optimizers. (4) **Student Selection**. Learning ability could be specific to student capacity and ResNet-like architectures. In our benchmark, we also replace the student model with another in order to investigate relevance, such as WRNet and MobileNet (ResNet by default).

**Shifted Datasets.** We choose five datasets for evaluation to explore the performance of KD on the two-dimensional shift of diversity and correlation. In terms of diversity shift, we use **PACS** (Li et al., 2017), **OfficeHome** (Venkateswara et al., 2017), and **DomainNet** (Peng et al., 2019b). Regarding correlation shift, we construct the modified version of MNIST and CelebA (Liu et al., 2015) based on recent work, also known as **CMNIST** (Arjovsky et al., 2019) and **CelebA-Blond** (Ye et al., 2022). For the constructed datasets, the training and test domains are pre-defined and fixed. More quantitative information and description of the datasets are shown in Appendix D.1.

**Evaluation Implementation.** The following implementation choices are highlighted to achieve a consistent and realistic assessment setting. (1) *Model choice*. To better understand the robustness of knowledge distillation under distribution shift, we select **ResNet-50/18** as the base teacher/student model, which is a common choice for previous distillation algorithms. ResNet is pretrained on ImageNet and then distilled for each dataset. (2) *Model selection criterion*. We using the same model selection criterion as the out-of-distribution generalization community, and there is still no consensus recently. We choose **Training-Domain Validation** as a criterion for consistency with existing work (Gulrajani & Lopez-Paz, 2020). (3) *Evaluation Metrics*. In our benchmarks, we include two metrics used as different aspects of the evaluation criteria. Along with the gold standard,

Table 1: Average accuracy for all KD algorithms on datasets dominated by diversity/correlation shift. These experiments compare more than 12 popular algorithms in five benchmarks under identical conditions.  $\Delta \uparrow$  denotes the improvement over vanilla KD.

| Method         |        | PACS             | OfficeHome       | DomainNet        | CelebA-B         | CMNIST           | Avg. | $\Delta \uparrow$ |
|----------------|--------|------------------|------------------|------------------|------------------|------------------|------|-------------------|
| Teacher        |        | 82.59            | 70.74            | 38.80            | 84.74            | 11.93            | 57.8 |                   |
| Student        |        | 75.99            | 63.47            | 34.42            | 83.91            | 11.01            | 53.8 |                   |
| KD             |        | $81.12 \pm 0.65$ | $65.44 \pm 0.36$ | $37.50 \pm 0.02$ | $84.55 \pm 0.38$ | $12.86 \pm 1.15$ | 56.3 | -                 |
| Feature-based  | Fitnet | $73.20 \pm 0.90$ | $60.51 \pm 0.80$ | $23.86 \pm 2.47$ | $85.82 \pm 1.63$ | $11.65 \pm 1.15$ | 51.0 | -9.39%            |
|                | AT     | $80.72 \pm 0.49$ | $65.51 \pm 0.13$ | $37.39 \pm 0.07$ | $84.58 \pm 0.08$ | $10.73 \pm 0.66$ | 55.8 | -0.90%            |
|                | FT     | $79.40 \pm 0.32$ | $62.96 \pm 0.30$ | $35.76 \pm 0.03$ | $84.90 \pm 1.12$ | $10.54 \pm 0.27$ | 54.7 | -2.81%            |
|                | AB     | $76.51 \pm 0.48$ | $54.83 \pm 1.10$ | $29.98 \pm 0.21$ | $85.57 \pm 1.22$ | $9.92 \pm 0.15$  | 51.4 | -8.76%            |
|                | NST    | $82.05 \pm 0.32$ | $65.65 \pm 0.29$ | $38.05 \pm 0.06$ | $84.81 \pm 0.18$ | $10.69 \pm 1.35$ | 56.3 | -0.08%            |
| Relation-based | SP     | $81.59 \pm 0.51$ | $65.20 \pm 0.04$ | $34.67 \pm 0.14$ | $84.58 \pm 2.21$ | $11.05 \pm 0.67$ | 55.4 | -1.56%            |
|                | PKT    | $81.47 \pm 0.58$ | $65.72 \pm 0.17$ | $37.93 \pm 0.09$ | $84.46 \pm 1.83$ | $12.15 \pm 1.29$ | 56.3 | 0.09%             |
|                | VID    | $80.45 \pm 0.91$ | $65.42 \pm 0.20$ | $37.55 \pm 0.12$ | $85.01 \pm 1.45$ | $10.49 \pm 0.32$ | 55.8 | -0.91%            |
|                | RKD    | $76.11 \pm 0.71$ | $46.12 \pm 1.06$ | $35.33 \pm 0.15$ | $84.37 \pm 0.98$ | $10.24 \pm 0.13$ | 50.4 | -10.41%           |
|                | CC     | $80.42 \pm 1.00$ | $65.30 \pm 0.02$ | $37.14 \pm 0.08$ | $85.43 \pm 0.35$ | $12.15 \pm 1.20$ | 56.1 | -0.37%            |
|                | CRD    | $79.66 \pm 0.15$ | $63.91 \pm 0.40$ | $37.75 \pm 0.04$ | $83.59 \pm 1.82$ | $11.48 \pm 1.28$ | 55.3 | -1.80%            |

**Average Accuracy**, we also report **Worst Group Accuracy** as evaluation criterion. The average and standard deviation were reported in Section 4 based on three seeds.

## 4 A FINE-GRAINED ANALYSIS

### 4.1 PERFORMANCE ACROSS TRANSFER ALGORITHMS

**KD can help lightweight model to alleviate the shift effect, but not consistently.** As Fig. 2a illustrates, we find that all KD algorithms can be an effective technique for improving worst-group accuracy of the lightweight model, as distillation makes training easier by providing more label information. However, we also observe in Table 1 that none of the KD methods consistently outperforms concerning the average accuracy in both directions of shift. For example, while improvements are available on datasets dominated by diversity shift, none of them can identify well on CMNIST with a strong correlation shift. The teacher learns the spurious correlation of color and label from training data, which reverses in the testing data, finally leads to poor teaching results.

**Vanilla is better, and more complex algorithms offer limited improvement.** More complex algorithms (vs. *vanilla*) perform well on worst-group case as depicted in Fig. 2a. However, upon further zooming in Table 1, most of complex methods may not be as effective, such as AB and RKD. Most of them cannot surpass *vanilla* KD in the most general and complicated cases of average accuracy. This supports our view that current KD algorithms remain largely vulnerable to distribution shift, yet still be effective in supporting worst-case. In addition, we also find that methods that learn from the relevance in teacher models are more generically valid, such as PKT. In contrast to relevance-based, feature-based students are worse on average accuracy. These findings inspired us to further understand the role of knowledge source in KD against distribution shift, and guides us to design new algorithms.

**Negative knowledge may be transferred from hint layer.** Our results demonstrate that the logit-based approach outperforms the others in terms of generalizability to distribution shift. We perform a center kernel analysis (CKA) (Kornblith et al., 2019) to analyze the reason and compare the features of the layer extracted by the teacher and different students. As shown in Fig. 3, the CKA of Fitnet highlights huge diversity of representation within the student model, except for the poor performance. This difference can be attributed to the distinct ability of the teacher and the student to learn from multiple domains. This again confirms previous observations in Table 4 that mimicking the teacher’s middle layer directly is not suitable when handling distribution shift, which prevents the alignment process of features.

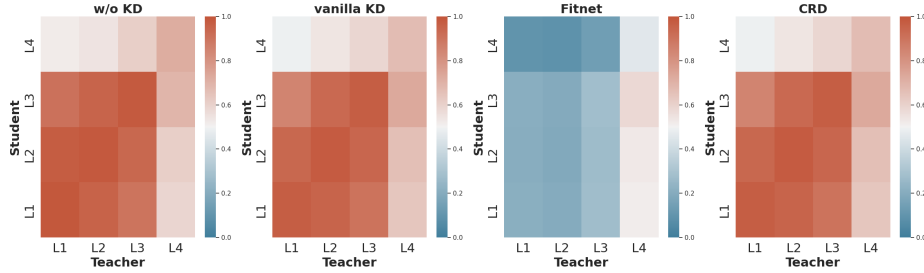

Figure 3: Representation similarity heatmap measured by CKA. L1  $\sim$  L4 represents the representation extracted from the first to fourth hint layer. The CKA representations inside the student model differs significantly based on their knowledge sources.

Table 2: Average accuracy for all data techniques on datasets dominated by diversity/correlation shift. These experiments compare 12 popular algorithms in five benchmarks under identical conditions, showing the robustness and improvement potential of data techniques.  $\Delta \uparrow$  denotes the improvement over vanilla KD.

| Method       |              | PACS             | OfficeHome       | DomainNet        | CelebA-B         | CMNIST           | Avg. | $\Delta \uparrow$ |
|--------------|--------------|------------------|------------------|------------------|------------------|------------------|------|-------------------|
| vanilla KD   |              | $81.12 \pm 0.65$ | $65.44 \pm 0.36$ | $37.50 \pm 0.02$ | $84.55 \pm 0.38$ | $12.86 \pm 1.15$ | 56.3 | -                 |
| Augmentation | + ImageNet   | $83.24 \pm 0.10$ | $67.31 \pm 0.22$ | $36.80 \pm 0.07$ | $84.48 \pm 0.20$ | $13.73 \pm 0.60$ | 57.1 | 1.45%             |
|              | + AutoAug    | $83.56 \pm 0.28$ | $67.44 \pm 0.17$ | $36.73 \pm 0.08$ | $85.15 \pm 0.32$ | $13.73 \pm 0.60$ | 57.3 | 1.83%             |
|              | + RandAug    | $83.00 \pm 0.61$ | $67.26 \pm 0.30$ | $37.11 \pm 0.03$ | $85.27 \pm 0.44$ | $13.73 \pm 0.60$ | 57.3 | 1.74%             |
|              | + Mixup      | $80.07 \pm 0.67$ | $65.74 \pm 0.06$ | $39.39 \pm 0.09$ | $85.43 \pm 1.04$ | $11.73 \pm 0.76$ | 56.5 | 0.32%             |
|              | + CutMix     | $78.70 \pm 0.37$ | $65.07 \pm 0.40$ | $38.00 \pm 0.18$ | $85.54 \pm 0.71$ | $11.83 \pm 1.30$ | 55.8 | -0.83%            |
|              | + DomainMix  | $79.61 \pm 0.22$ | $65.43 \pm 0.10$ | $34.84 \pm 0.13$ | $85.17 \pm 0.35$ | $11.24 \pm 1.08$ | 55.3 | -1.84%            |
|              | + Mixstyle   | $80.63 \pm 0.39$ | $65.90 \pm 0.46$ | $37.50 \pm 0.02$ | $85.38 \pm 0.17$ | $13.73 \pm 0.60$ | 56.6 | 0.59%             |
|              | + Noise      | $66.78 \pm 2.27$ | $52.74 \pm 1.69$ | $18.84 \pm 0.21$ | $76.38 \pm 1.93$ | $10.37 \pm 0.72$ | 45.0 | -20.02%           |
| Pruning      | + Prune_rand | $79.43 \pm 0.39$ | $64.78 \pm 0.22$ | $37.09 \pm 0.01$ | $84.69 \pm 0.49$ | $13.99 \pm 0.33$ | 56.0 | -0.53%            |
|              | + EL2N       | $79.02 \pm 1.69$ | $64.20 \pm 0.34$ | $36.24 \pm 0.04$ | $83.89 \pm 1.49$ | $14.33 \pm 1.01$ | 55.5 | -1.35%            |
|              | + GraNd      | $79.05 \pm 0.54$ | $64.14 \pm 0.04$ | $36.82 \pm 0.02$ | $83.89 \pm 1.91$ | $14.65 \pm 0.12$ | 55.7 | -1.04%            |

## 4.2 THE ROLE OF DISTILLATION DATA

**Data augmentation helps, but no forever winner.** As Fig. 2b (right) reveals, the effectiveness of augmentation depends on the realistic situation of datasets. Any form of data augmentation can be effective as it increases the likelihood of a student matching across multiple domains. However, different strategy shows diverse results in Table 2. Of all shift settings, random-based augmentation typically improves performance, while generation-based augmentation performs better on correlation shift, *e.g.*, AutoAugment versus CutMix. It is worth noting that the Gaussian noise falls on all datasets, decreasing significantly compared to our baseline. Noisy information brings incorrect knowledge and aggravates teacher-student disagreement brought by shift.

**Students learning with random-based augmentation perform better.** As Table 2 summarizes, random-based augmentation (*i.e.*, RandAugment and AutoAugment) are combinations of different tricks, their performances are more changeable (with close mean but higher variance) when compared to ImageNet baseline. Generation-based augmentation has shown to be a powerful tool such as Mixup, but vice versa in our benchmark. We also can find DomainMix and CutMix performs poor on the dataset with diversity and correlation shift. Our analysis has led us to the conclusion that in the case of distribution shift, the augmentation effect for KD needs to satisfying two key conditions, one being close to ground-level truth and the other being close to the teacher’s knowledge. The above observation is also consistent with (Beyer et al., 2022) in that consistent image view is the key to a sound practice of KD even under distribution shift.

**Data pruning makes sense for KD under distribution shift.** Our observation in Table 2 suggest that not all training samples are equal, with data pruning exploring data quality required for distillation by keeping important examples. Specifically, we observed that selecting 75% of all samples and utilizing distillation techniques yielded a student model that retained over 95% of its pre-

Table 3: The performance of Pretraining and Optimizer Selection on PACS (%). The training strategy can have a strong impact on the distribution shift during the distillation process.

| Method       | Art  | Cartoon | Photo | Sketch | Avg. |
|--------------|------|---------|-------|--------|------|
| Baseline     | 81.5 | 78.1    | 95.4  | 69.4   | 81.1 |
| w/ Adam      | 51.7 | 62.9    | 70.7  | 61.2   | 61.6 |
| w/o Pretrain | 33.6 | 40.6    | 51.3  | 27.4   | 38.2 |

Table 4: Results of different layers on  $\ell_{reg}$  (%). L1  $\sim$  L4 represent the distillation using the knowledge from the first to fourth hint layer.

| Method | Art  | Cartoon | Photo | Sketch | Avg. |
|--------|------|---------|-------|--------|------|
| KD     | 81.5 | 78.1    | 95.4  | 69.4   | 81.1 |
| w/ L1  | 74.5 | 75.3    | 91.0  | 62.0   | 75.7 |
| w/ L2  | 70.3 | 72.9    | 89.0  | 54.7   | 71.7 |
| w/ L3  | 67.4 | 71.2    | 88.9  | 61.5   | 72.3 |
| w/ L4  | 81.5 | 78.2    | 94.5  | 74.2   | 82.1 |

pruning performance. Moreover, we found that random pruning outperformed other well-designed metrics. Interestingly, our results indicate that data pruning even can outperform data augmentation techniques in correlation shift-dominated datasets, such as CMNIST. Overall, our study provides empirical evidence highlighting the significance of carefully selecting data for distillation purposes. These insights could inform the creation and utilization of distillation datasets.

#### 4.3 POSSIBLE CAUSES ON TRAINING OPTION

In addition to our primary findings, we conducted a thorough examination of key factors that impact the optimization program. Our investigation yielded several intriguing observations, which are as follows. **(1) Pretraining is helpful.** Pretraining on ImageNet can be a valuable technique for distillation tasks to distribution shift, provided that the features learned during pretraining are beneficial for the student’s performance (Table 3). **(2) SGD for KD on distribution shift, not Adam.** While Adam and SGD are typically comparable in their performance in KD, our evaluation revealed a notable deviation from this norm. Specifically, we observed a significant decrease in performance when utilizing Adam compared to SGD in Table 3. We speculate that it may be that adaptive optimizers (e.g., Adam) are more prone to overfitting in the face of shift. **(3) Results of other student architectures.** We further evaluate our benchmark using other small networks. KD still has an overall boosting effect on tiny models. However, the extent of gain varies depending on the domain. (Appendix Fig. 6). KD can generally improve the performance of Mobilenet on Art and Cartoon, but not on Photo or Sketch in PACS dataset. These results suggest that improving the robustness of these models to distribution shift may be challenging, particularly in the worst-case scenario.

#### 4.4 MORE OBSERVATIONS ON OUR BENCHMARK.

**Performance across different types of shift.** Several algorithms improve much better over the pre-KD period on the situation of diversity shift. However, in the case of CMNIST and CelebA, most of the algorithms can not minimize the gap between teacher and student. Consequently, we argue that previous KD algorithms remain largely vulnerable to spurious correlations. In particular, Empirical Risk Minimization (ERM) still achieves good results, but the problem is that students receive ‘bias’ in the teacher model while being taught. The use of data manipulation can get rid of bias to some extent, but this is limited by how relevant the manipulated data is to the ground truth.

**High-quality KD data is needed.** The distillation data needed for student model can be original or after augmentation or pruning. This depends on the structure and goals of KD model. Augmenting the data can enhance its diversity and robustness, while pruning can reduce redundancy and noise. However, in any case, the aim of manipulation is to make some useful change to our training data so that we can get more high-quality data and its distribution is closer to the invariant one across any distribution.

**Different students fall into diverse activation maps.** We provide a preliminary visualization from the target domain in Fig. 4 using class activation map (CAM) (Selvaraju et al., 2017). We observe that distillation can help student model to learn more exact and specific invariant representations under distribution shift, e.g., the face of the dog which is focused by learning from the teacher model (Fig. 4b and 4c). We further compare CAM between the data and knowledge transfer algorithms and find that after different forms of knowledge transfer, the key discriminant area of students changes while not much change for data augmentation (Fig. 4d, 4e and 4f).



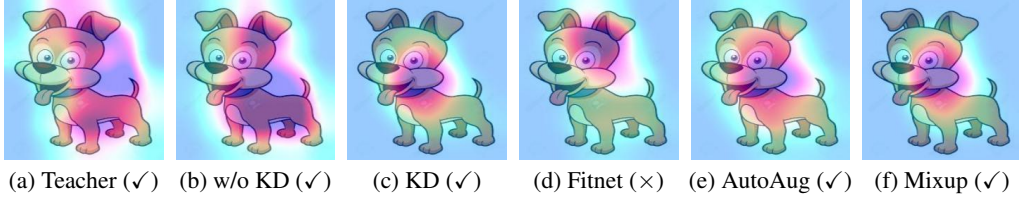

Figure 4: The visualization of Grad-CAM from different models using PACS dataset. Models after distillation pay more attention to the region of interest for specific characteristics. ✓/ ✗ denotes whether the prediction is correct or not. KD algorithms can alter the focus of the student, with data techniques the other way round.

**Knowledge from shallow hint layers misleads the student while distribution shift.** To analyze the influence of knowledge in different hint layers, we conduct ablation experiments on four variants of the distillation loss term. As reported in Table 4, we observe an obvious performance drop after matching the first to third layer in the teacher model. Unlike (Romero et al., 2014), which tended to choose the middle layer of the student model as the guiding layer, we find that the fourth layer achieves the best. The upshot is, that knowledge from shallow layers in the teacher model may mislead the student under distribution shift.

## 5 META RECOMMENDATION AND CONCLUSION

Distribution shift resulted in poor KD, so there must be no free lunches in this situation when choosing the KD method. Here are some helpful recommendations to consider according to **various goals of distribution shift**.

**REC 1: Knowledge distillation works.** Neural networks deployed on-device with tiny capacity and low complexity, increasing their susceptibility to overfitting under distribution shift. Therefore, lightweight models should be trained separately from large scale, and KD is much better to achieve this with our benchmarking observation.

**REC 2: Vanilla is enough, and exploring novel algorithms is required.** Complex transfer patterns offer limited improvement. Feature- and relation-based KD lead to limited improvements across the different types of distribution shift. Of these approaches, vanilla KD generally performs well to distribution shift, and few other complex methods consistently outperform KD by itself. How to make these methods robust to shift is still an open question, especially for the correlation shift.

**REC 3: Using augmentation for robust KD performance** Augmentation closed to the ground-level distribution is more robust to KD for shifted data. If data augmentation can help KD to extract invariant features and extrapolate to unseen environments, please use them. An additional suggestion is that if data augmentation fails to provide well assistance, it presents a promising avenue for further to explore novel methods at data level to enhance the shift robustness of the student model.

**REC 4: Do not forget pretraining and SGD.** Distribution shift affects the choice of training strategy. Pretraining can help distill to more robust features when the relevance of the downstream task is high. And SGD is superior to Adam in knowledge distillation for distribution shift. An area to be studied is the choice of KD training strategy when the shift occurs.

**Conclusion.** We formulate the novel knowledge distillation paradigm under distributional shift situations and broaden the learning objectives of knowledge distillation to multiple domains to address the distribution shifts in real application scenarios. We propose a systematic evaluation framework from three diverse perspectives including the knowledge distillation algorithms, data manipulation mechanisms and optimization options, and we take a comprehensive evaluation benchmark covering more than 20 methods for five benchmark datasets. Several novel insights and tips based on our benchmark are summarized to allow the research community to find optimal solutions when applying knowledge distillation techniques in real scenarios. We also provide further discussion on the limitations and open questions of our benchmark in Appendix B

## REFERENCES

- Sungsoo Ahn, Shell Xu Hu, Andreas Damianou, Neil D Lawrence, and Zhenwen Dai. Variational information distillation for knowledge transfer. In *Proceedings of the IEEE/CVF Conference on Computer Vision and Pattern Recognition*, pp. 9163–9171, 2019.
- Zeyuan Allen-Zhu and Yuanzhi Li. Towards understanding ensemble, knowledge distillation and self-distillation in deep learning. *arXiv preprint arXiv:2012.09816*, 2020.
- Martin Arjovsky, Léon Bottou, Ishaan Gulrajani, and David Lopez-Paz. Invariant risk minimization. *arXiv preprint arXiv:1907.02893*, 2019.
- Lucas Beyer, Xiaohua Zhai, Amélie Royer, Larisa Markeeva, Rohan Anil, and Alexander Kolesnikov. Knowledge distillation: A good teacher is patient and consistent. In *Proceedings of the IEEE/CVF Conference on Computer Vision and Pattern Recognition*, pp. 10925–10934, 2022.
- Léon Bottou. Stochastic gradient descent tricks. In *Neural Networks: Tricks of the Trade: Second Edition*, pp. 421–436. Springer, 2012.
- Fabio M Carlucci, Antonio D’Innocente, Silvia Bucci, Barbara Caputo, and Tatiana Tommasi. Domain generalization by solving jigsaw puzzles. In *Proceedings of the IEEE/CVF Conference on Computer Vision and Pattern Recognition*, pp. 2229–2238, 2019.
- Yongqiang Chen, Kaiwen Zhou, Yatao Bian, Binghui Xie, Kaili Ma, Yonggang Zhang, Han Yang, Bo Han, and James Cheng. Pareto invariant risk minimization. *arXiv preprint arXiv:2206.07766*, 2022.
- Ekin D Cubuk, Barret Zoph, Dandelion Mane, Vijay Vasudevan, and Quoc V Le. Autoaugment: Learning augmentation policies from data. *arXiv preprint arXiv:1805.09501*, 2018.
- Ekin D Cubuk, Barret Zoph, Jonathon Shlens, and Quoc V Le. Randaugment: Practical automated data augmentation with a reduced search space. In *Proceedings of the IEEE/CVF conference on computer vision and pattern recognition workshops*, pp. 702–703, 2020.
- Yaroslav Ganin and Victor Lempitsky. Unsupervised domain adaptation by backpropagation. In *International conference on machine learning*, pp. 1180–1189. PMLR, 2015.
- Jianping Gou, Baosheng Yu, Stephen J Maybank, and Dacheng Tao. Knowledge distillation: A survey. *International Journal of Computer Vision*, 129:1789–1819, 2021.
- Ishaan Gulrajani and David Lopez-Paz. In search of lost domain generalization. *arXiv preprint arXiv:2007.01434*, 2020.
- Zhiwei Hao, Jianyuan Guo, Kai Han, Han Hu, Chang Xu, and Yunhe Wang. Vanillakd: Revisit the power of vanilla knowledge distillation from small scale to large scale. *arXiv preprint arXiv:2305.15781*, 2023.
- Byeongho Heo, Minsik Lee, Sangdoo Yun, and Jin Young Choi. Knowledge transfer via distillation of activation boundaries formed by hidden neurons. In *Proceedings of the AAAI Conference on Artificial Intelligence*, volume 33, pp. 3779–3787, 2019.
- Geoffrey Hinton, Oriol Vinyals, and Jeff Dean. Distilling the knowledge in a neural network. *arXiv preprint arXiv:1503.02531*, 2015.
- Shoubo Hu, Kun Zhang, Zhitang Chen, and Laiwan Chan. Domain generalization via multidomain discriminant analysis. In *Uncertainty in Artificial Intelligence*, pp. 292–302. PMLR, 2020.
- Zehao Huang and Naiyan Wang. Like what you like: Knowledge distill via neuron selectivity transfer. *arXiv preprint arXiv:1707.01219*, 2017.
- Jangho Kim, SeongUk Park, and Nojun Kwak. Paraphrasing complex network: Network compression via factor transfer. *Advances in neural information processing systems*, 31, 2018.

- Diederik P Kingma and Jimmy Ba. Adam: A method for stochastic optimization. *arXiv preprint arXiv:1412.6980*, 2014.
- Simon Kornblith, Mohammad Norouzi, Honglak Lee, and Geoffrey Hinton. Similarity of neural network representations revisited. In *International conference on machine learning*, pp. 3519–3529. PMLR, 2019.
- Da Li, Yongxin Yang, Yi-Zhe Song, and Timothy M Hospedales. Deeper, broader and artier domain generalization. In *Proceedings of the IEEE international conference on computer vision*, pp. 5542–5550, 2017.
- Da Li, Yongxin Yang, Yi-Zhe Song, and Timothy Hospedales. Learning to generalize: Meta-learning for domain generalization. In *Proceedings of the AAAI conference on artificial intelligence*, volume 32, 2018.
- Ziyue Li, Kan Ren, Xinyang Jiang, Bo Li, Haipeng Zhang, and Dongsheng Li. Domain generalization using pretrained models without fine-tuning. *arXiv preprint arXiv:2203.04600*, 2022.
- Jiashuo Liu, Zheyuan Hu, Peng Cui, Bo Li, and Zheyang Shen. Heterogeneous risk minimization. In *International Conference on Machine Learning*, pp. 6804–6814. PMLR, 2021.
- Ziwei Liu, Ping Luo, Xiaogang Wang, and Xiaoou Tang. Deep learning face attributes in the wild. In *Proceedings of the IEEE international conference on computer vision*, pp. 3730–3738, 2015.
- Wonpyo Park, Dongju Kim, Yan Lu, and Minsu Cho. Relational knowledge distillation. In *Proceedings of the IEEE/CVF Conference on Computer Vision and Pattern Recognition*, pp. 3967–3976, 2019.
- Nikolaos Passalis and Anastasios Tefas. Learning deep representations with probabilistic knowledge transfer. In *Proceedings of the European Conference on Computer Vision (ECCV)*, pp. 268–284, 2018.
- Mansheej Paul, Surya Ganguli, and Gintare Karolina Dziugaite. Deep learning on a data diet: Finding important examples early in training. *Advances in Neural Information Processing Systems*, 34:20596–20607, 2021.
- Baoyun Peng, Xiao Jin, Jiaheng Liu, Dongsheng Li, Yichao Wu, Yu Liu, Shunfeng Zhou, and Zhaoning Zhang. Correlation congruence for knowledge distillation. In *Proceedings of the IEEE/CVF International Conference on Computer Vision*, pp. 5007–5016, 2019a.
- Xingchao Peng, Qinxun Bai, Xide Xia, Zijun Huang, Kate Saenko, and Bo Wang. Moment matching for multi-source domain adaptation. In *Proceedings of the IEEE/CVF international conference on computer vision*, pp. 1406–1415, 2019b.
- Adriana Romero, Nicolas Ballas, Samira Ebrahimi Kahou, Antoine Chassang, Carlo Gatta, and Yoshua Bengio. Fitnets: Hints for thin deep nets. *arXiv preprint arXiv:1412.6550*, 2014.
- Ramprasaath R Selvaraju, Michael Cogswell, Abhishek Das, Ramakrishna Vedantam, Devi Parikh, and Dhruv Batra. Grad-cam: Visual explanations from deep networks via gradient-based localization. In *Proceedings of the IEEE international conference on computer vision*, pp. 618–626, 2017.
- Ben Sorscher, Robert Geirhos, Shashank Shekhar, Surya Ganguli, and Ari Morcos. Beyond neural scaling laws: beating power law scaling via data pruning. *Advances in Neural Information Processing Systems*, 35:19523–19536, 2022.
- Samuel Stanton, Pavel Izmailov, Polina Kirichenko, Alexander A Alemi, and Andrew G Wilson. Does knowledge distillation really work? In *Advances in Neural Information Processing Systems*, volume 34, pp. 6906–6919. Curran Associates, Inc., 2021.
- Yonglong Tian, Dilip Krishnan, and Phillip Isola. Contrastive representation distillation. *arXiv preprint arXiv:1910.10699*, 2019.

- Frederick Tung and Greg Mori. Similarity-preserving knowledge distillation. In *Proceedings of the IEEE/CVF International Conference on Computer Vision*, pp. 1365–1374, 2019.
- Hemanth Venkateswara, Jose Eusebio, Shayok Chakraborty, and Sethuraman Panchanathan. Deep hashing network for unsupervised domain adaptation. In *Proceedings of the IEEE conference on computer vision and pattern recognition*, pp. 5018–5027, 2017.
- Wenhao Wang, Shengcai Liao, Fang Zhao, Cuicui Kang, and Ling Shao. Domainmix: Learning generalizable person re-identification without human annotations. *arXiv preprint arXiv:2011.11953*, 2020.
- Yufei Wang, Haoliang Li, Lap-pui Chau, and Alex C Kot. Embracing the dark knowledge: Domain generalization using regularized knowledge distillation. In *Proceedings of the 29th ACM International Conference on Multimedia*, pp. 2595–2604, 2021.
- Olivia Wiles, Sven Gowal, Florian Stimberg, Sylvestre Alvisé-Rebuffi, Ira Ktena, Krishnamurthy Dvijotham, and Taylan Cemgil. A fine-grained analysis on distribution shift. *arXiv preprint arXiv:2110.11328*, 2021.
- Yuzhe Yang, Haoran Zhang, Dina Katabi, and Marzyeh Ghassemi. Change is hard: A closer look at subpopulation shift. *arXiv preprint arXiv:2302.12254*, 2023.
- Nanyang Ye, Kaican Li, Haoyue Bai, Runpeng Yu, Lanqing Hong, Fengwei Zhou, Zhenguo Li, and Jun Zhu. Ood-bench: Quantifying and understanding two dimensions of out-of-distribution generalization. In *Proceedings of the IEEE/CVF Conference on Computer Vision and Pattern Recognition*, pp. 7947–7958, 2022.
- Sangdoo Yun, Dongyoon Han, Seong Joon Oh, Sanghyuk Chun, Junsuk Choe, and Youngjoon Yoo. Cutmix: Regularization strategy to train strong classifiers with localizable features. In *Proceedings of the IEEE/CVF international conference on computer vision*, pp. 6023–6032, 2019.
- Sergey Zagoruyko and Nikos Komodakis. Paying more attention to attention: Improving the performance of convolutional neural networks via attention transfer. *arXiv preprint arXiv:1612.03928*, 2016.
- Hanlin Zhang, Yi-Fan Zhang, Weiyang Liu, Adrian Weller, Bernhard Schölkopf, and Eric P Xing. Towards principled disentanglement for domain generalization. In *Proceedings of the IEEE/CVF Conference on Computer Vision and Pattern Recognition*, pp. 8024–8034, 2022a.
- Hongyi Zhang, Moustapha Cisse, Yann N Dauphin, and David Lopez-Paz. mixup: Beyond empirical risk minimization. *arXiv preprint arXiv:1710.09412*, 2017.
- Xingxuan Zhang, Peng Cui, Renzhe Xu, Linjun Zhou, Yue He, and Zheyang Shen. Deep stable learning for out-of-distribution generalization. In *Proceedings of the IEEE/CVF Conference on Computer Vision and Pattern Recognition*, pp. 5372–5382, 2021.
- Yabin Zhang, Minghan Li, Ruihuang Li, Kui Jia, and Lei Zhang. Exact feature distribution matching for arbitrary style transfer and domain generalization. In *Proceedings of the IEEE/CVF Conference on Computer Vision and Pattern Recognition*, pp. 8035–8045, 2022b.
- Kaiyang Zhou, Yongxin Yang, Yu Qiao, and Tao Xiang. Domain generalization with mixstyle. *arXiv preprint arXiv:2104.02008*, 2021.

## A RELATED WORKS

There are two areas that closely relate to our research, namely *out-of-distribution generalization* and *knowledge distillation*, and we briefly revisit prior studies as follows.

**Benchmarking Knowledge distillation.** To develop lightweight deep networks, Hinton et al. (2015) first proposed the concept of knowledge distillation, which replaces one-hot ground truth with “dark knowledge” and defined the teaching manner. Several follow-up studies extended vanilla KD by redesigning the knowledge types to guide the learning of the student model. Such methods can be categorized into two types, feature-based methods and relation-based methods. Feature-based distillation methods primarily utilized the representation from the hidden layer, i.e., the activation and feature map Romero et al. (2014); Zagoruyko & Komodakis (2016); Kim et al. (2018); Heo et al. (2019); Huang & Wang (2017). Relation-based distillation methods focused more on the useful relationships between different neurons, layers, or sample pairs Tung & Mori (2019); Park et al. (2019); Peng et al. (2019a); Tian et al. (2019). However, existing studies have made efforts in investigating the mechanisms about how knowledge distillation works, and they focused mainly on the generalization ability under the assumption of *i.i.d.* Allen-Zhu & Li (2020); Stanton et al. (2021); Hao et al. (2023). No studies has discussed about how knowledge distillation methods work under non-*i.i.d.* situations. We explore and discuss how KD methods work without the *i.i.d.* assumption. It is a new setting for KD and is the practical setting in the real world. We propose a systematic evaluation framework to benchmark knowledge distillation against distribution shifts.

**Benchmarking distribution shift.** To tackle the problem of distribution shifts when training with multiple domains and generalizing to unseen domains, existing methods can be divided into three groups: (1) **Data augmentation.** Zhang et al. (2017); Wang et al. (2020); Zhou et al. (2021); Zhang et al. (2022b) enhanced the generalization performance of OoD models by improving the quantity and diversity of data from multiple domains. (2) **Representation learning.** Representation learning can perform inter-domain feature alignment via kernels Hu et al. (2020), adversarial learning Ganin & Lempitsky (2015), *etc.*, or minimize the invariant risk to learn domain-invariant features Arjovsky et al. (2019); Liu et al. (2021); Chen et al. (2022), or disentangle features into domain-shared or specific parts for better generalization Zhang et al. (2021; 2022a). (3) **Learning strategy.** This kind of methods enhanced the generalization ability with the usage of general learning strategies, such as ensemble learning Li et al. (2022), meta learning Li et al. (2018) and self-supervised learning Carlucci et al. (2019). However, recent studies have discovered that ERM methods outperformed state-of-the-art on average when carefully tuned and implemented Gulrajani & Lopez-Paz (2020); Ye et al. (2022). Different from prior studies, we investigate when and how the distribution shifts can be mitigated through distillation learning. Through our thorough and systematic studies, we observe that KD can effectively enhance the robustness of small models in unknown environments, especially for the worst group.

## B MORE DISCUSSION

**Less variance in available KD methods while distribution shift.** We first calculate the Spearman rank correlation between each pair of average accuracy to see how consistent induced by different KD approaches. Interestingly, we find substantial similarity across methods in Fig. 5, even in identical categories with rank correlations almost 1.0 (AT, FT and SP). We also observe the diverse performance between methods in Fig. 5a and 5b, but the not much variability suggests that the existing methods are still not a good solution for distribution shift.

**The selection of distillation methods based solely on the prior is not a viable option.** Although our evaluation and comparison based on quantitative distribution shifts will be helpful to practitioners to choose a better method. However, in real-world applications, data collection in unknown environments is expensive, so how to precisely pinpoint distribution shifts and deploy lightweight models on end-side is an important area in the future.

**Our negative claims should be critically considered.** Our negative statements (e.g., “Method A does not work better than KD against distribution shift”) are based on the fact that such statements are setting-specific and context-constrained. However, one of our key contributions is to introduce a new perspective on the distribution shift for knowledge distillation, even in model compression. We will make our code baseline available in the future to motivate more researchers to participate.

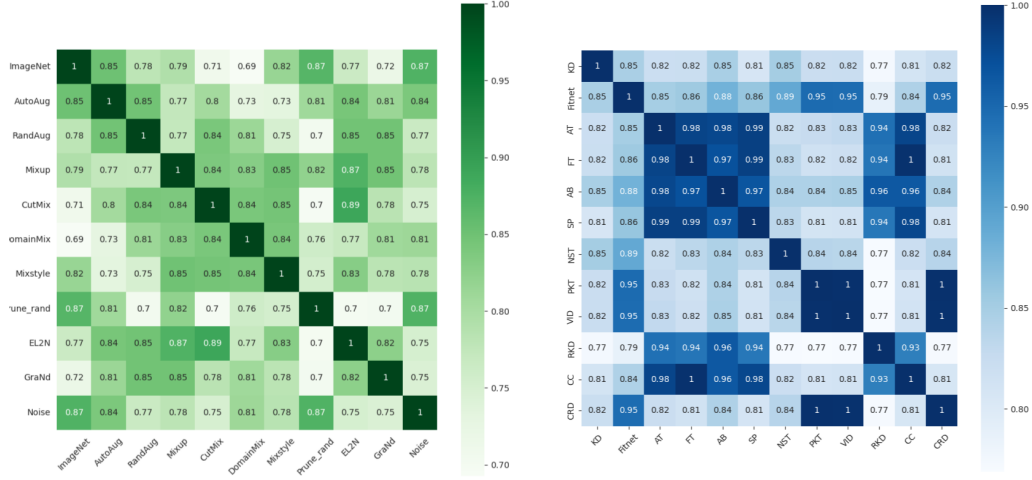

Figure 5: Spearman’s rank correlation between all pairs of KD algorithms. Algorithms of similar type are more strongly correlated. *Left*: correlation between data manipulation algorithms; *Right*: correlation between Knowledge Transfer algorithms. The coordinate axes represent different methods.

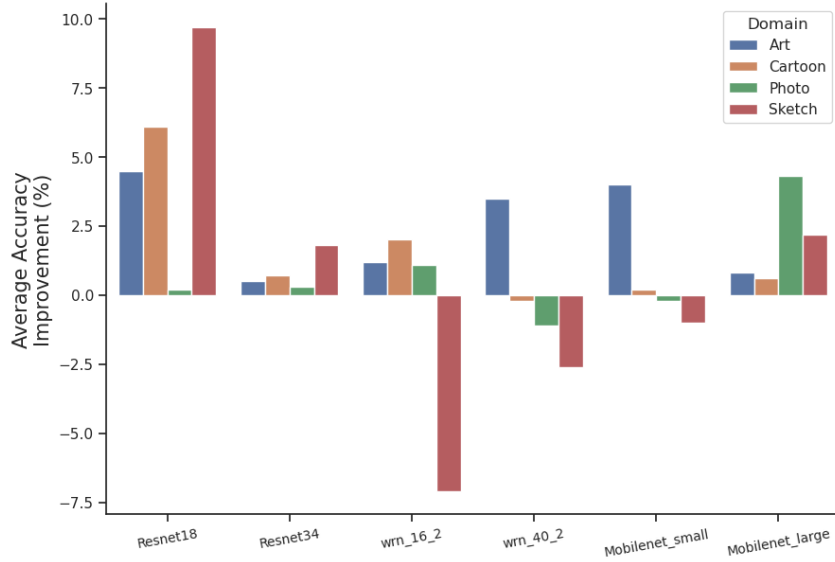

Figure 6: Gaps on PACS between different models before/after KD to distribution shift (%).

Table 5: Gaps between different models before/after KD (%).

| Model       | Params | Art | Cartoon | Photo | Sketch | Avg. |
|-------------|--------|-----|---------|-------|--------|------|
| Resnet18    | 11.35M | 4.5 | 6.1     | 0.2   | 9.7    | 5.1  |
| Resnet34    | 21.29M | 0.5 | 0.7     | 0.3   | 1.8    | 0.8  |
| wrn_16_2    | 0.70M  | 1.2 | 2.0     | 1.1   | -7.1   | -0.7 |
| wrn_40_2    | 2.26M  | 3.5 | -0.2    | -1.1  | -2.6   | -0.1 |
| Mobilenet_s | 0.93M  | 4.0 | 0.2     | -0.2  | -1.0   | 0.8  |
| Mobilenet_l | 2.98M  | 3.2 | 0.8     | 0.6   | 4.3    | 2.2  |

Table 6: The details of five popular datasets for distribution shift.

| Dataset    | #Domain | #Class | #Samples | Type   | Diversity shift | Correlation shift |
|------------|---------|--------|----------|--------|-----------------|-------------------|
| PACS       | 4       | 7      | 9,991    | Mixed  | 0.6715          | 0.0338            |
| OfficeHome | 4       | 65     | 15,588   | Mixed  | 0.0657          | 0.0699            |
| DomainNet  | 6       | 345    | 586,575  | Mixed  | 0.3740          | 0.1061            |
| CMNIST     | 3       | 2      | -        | Digits | 0.0013          | 0.5468            |
| CelebA-B   | 3       | 2      | 49,560   | Face   | 0.0031          | 0.1868            |

**Open questions.** There are also many other interesting questions worth exploring. How to design a more advanced algorithm so that students can better deal with deviations, especially correlation shift? And how to design distillation strategies that provide a good trade-off between performance and efficiency in response to distribution shifts? While pre-trained large models like GPT-4.0 have achieved state-of-the-art in several tasks, how to distill lightweight models and achieve low-latency inference constrained by system resource and computation power? And so on.

## C QUANTIFICATION ON DISTRIBUTION SHIFT.

Given a training dataset  $D_{tr} = \{D^e = (x^e, y^e)\}_{e=1}^K$ , each are sampled from the joint distribution  $P_{\mathcal{X} \times \mathcal{Y}}^e$ . The dataset is sampled from the probability distribution  $P^e(\mathcal{X} \times \mathcal{Y})$ . The input  $x \in \mathcal{X}$  is determined by the semantic factor  $Se$  and the variation factor  $Var$  based on causal theory, while the output  $y \in \mathcal{Y}$  is determined by  $Se$  independently. In order to better study the performance of KD under distributional shift, we propose to analyze and characterize how features change in the downstream domain. Consider a teacher/student model that can be identified as a feature extractor  $f : \mathcal{X} \rightarrow Var$ . The distribution of the training environment  $P^{tr}(\mathcal{X} \times \mathcal{Y})$  and the test environment  $P^{te}(\mathcal{X} \times \mathcal{Y})$  is denoted as  $\phi$  and  $\psi$ , respectively. Inspired by the real world, the distribution shifts can be typically formalized into two types of  $P(f(X))$  and  $P(Y|f(X))$ , namely *diversity shift* and *correlation shift* (Ye et al., 2022).

The quantification formula of two shifts is defined to support the comprehension and evaluation of KD algorithms, respectively:

$$F_{div}(\phi, \psi) = \frac{1}{2} \int_{\mathcal{V}_1} |\phi(v) - \psi(v)| dv$$

$$F_{cor}(\phi, \psi) = \frac{1}{2} \int_{\mathcal{V}_2} \sqrt{\phi(v) \cdot \psi(v)} \sum_{y \in \mathcal{Y}} |\phi(y|v) - \psi(y|v)| dv$$

where  $y$  to be discrete, and  $\mathcal{V}_1$  and  $\mathcal{V}_2$  are partitions of  $V$  as follows,

$$\mathcal{V}_1 := \{v \mid \phi(v) \cdot \psi(v) = 0, v \in Var\}$$

$$\mathcal{V}_2 := \{v \mid \phi(v) \cdot \psi(v) \neq 0, v \in Var\}$$

$F_{div}$  describes the fact that each environment in the dataset (such as PACS (Li et al., 2017)) represents a diversity of characteristics in domains.  $F_{cor}$  is caused by spurious correlations in the data that have received more recent attention. For example, the MNIST variant, CMNIST (Arjovsky et al., 2019), consists of the digits with red or green, but flipping the strong correlation of colors and labels in different environments, thus creating correlation shift that confuses the model. Detailed quantification and examples can be found in Fig. 7.

## D DETAILS OF OUR FRAMEWORK

### D.1 DATASETS

Our benchmark includes the following datasets dominated by diversity/correlation shift, and we provide more details in Table 6 about class, type and the quantification of shift (Ye et al., 2022):

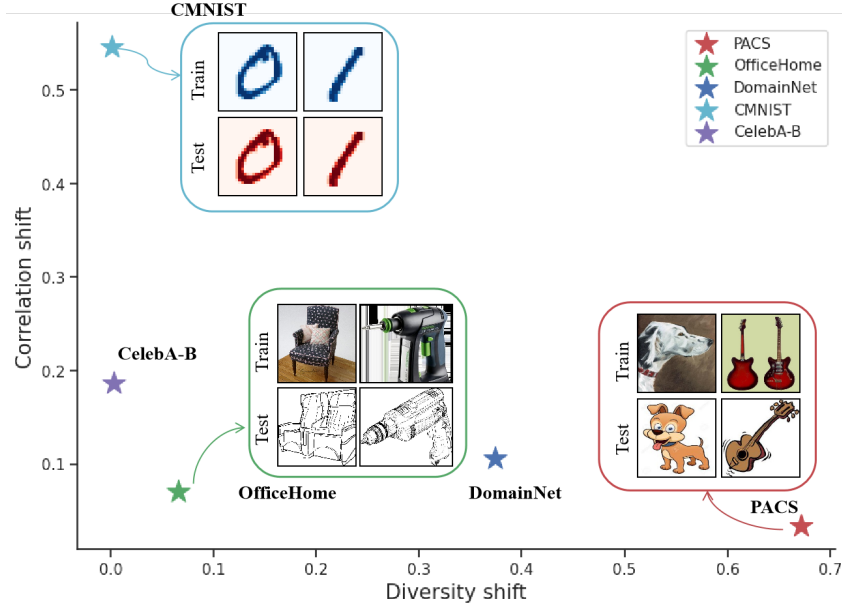

Figure 7: Examples of OoD datasets on different kinds of distribution shift.

Table 6 below first lists all the real-world datasets that have been evaluated as diversity shift in our framework with more details. Among them, PACS (Li et al., 2017), OfficeHome (Venkateswara et al., 2017) are collected from different source as domains, and are most popular dataset. As a large-scale evaluation dataset, DomainNet (Peng et al., 2019b) consists of more domains and categories.

- **PACS** is a widely used benchmark for domain generalization (DG) research. The dataset comprises images of objects and creatures depicted in various styles, which are categorized into four domains: photos, art, cartoons, and sketches. In total, the dataset contains 9,991 examples of dimension (3, 224, 224) and 7 classes.
- **OfficeHome** is another commonly used DG benchmark that shares similarities with PACS. It contains images categorized into four domains: art, clipart, product, and real, with a total of 15,588 examples of dimension (3, 224, 224) and 65 classes.
- **DomainNet** is another DG benchmark that shares similarities with PACS. It consists of images grouped into six domains: clipart, infograph, painting, quickdraw, real, and sketch. The dataset comprises 0.6 million images of dimension (3, 224, 224) and 345 classes.

Also, most image datasets are not produced for distribution shift, but one modifies them with some artificial transformations to simulate such shifts, such as CMNIST and CelebA-B (Arjovsky et al., 2019). The variant of original datasets with well-designed make it available for further study and verification on correlation shift.

- **CMNIST** is a modified version of the MNIST handwritten digit classification dataset. In this variant, digits are colored either red or green, with each color strongly correlated with a specific class of digits. Notably, the correlation between color and digit class differs between training and testing, resulting in spurious correlation. Consistent with previous research (Arjovsky et al., 2019), the dataset comprises 60,000 examples of dimension (28, 28, 1) and 2 classes.
- **CelebA** is a widely used dataset in AI fairness and distribution shift research. It comprises over 200,000 images of celebrity face, each annotated with 40 attributes. In line with previous studies, we treat "hair color" as the classification target and "gender" as the spurious attribute. To simulate the correlation shift seen in CMNIST, we select a subset of 27,040 images divided into three distinct environments. Our approach leverages the group with the smallest number of images, consisting of blond-haired males. Additional information of CelebA-B on the environment splits can be found in Table 7.



Table 7: The domain split and samples of CelebA-B dataset.

| #Env.   | #Class    | Male   | Female |
|---------|-----------|--------|--------|
| Train 1 | blond     | 462    | 11,671 |
|         | not blond | 11,671 | 462    |
| Train 2 | blond     | 924    | 11,209 |
|         | not blond | 11,209 | 924    |
| Test    | blond     | 362    | 363    |

It is worth noting that most of the OOD datasets can be used for our benchmarking, with the exception of the datasets we discuss here.

## D.2 KNOWLEDGE TRANSFER TYPES

Here is a more elaborate explanation of the distillation methods mentioned in our benchmark:

- **Knowledge Distillation (KD)** (Hinton et al., 2015) is the first technique that transfers the knowledge from a large teacher model to a smaller student model by minimizing the KL divergence between their output distributions. It is also known as soft target distillation or logits-based distillation. This technique allows the student model to learn from the softened probabilities of the teacher model, which contain more information than the hard labels. It also reduces the overfitting problem of the student model by smoothing the output distribution.
- Feature-based knowledge is a category of distillation methods that leverage the intermediate features or activations of the teacher model to guide the student model. Some examples are:
  - **Fitnet** (Romero et al., 2014) is a method that matches the feature maps of a thinner and deeper student network to those of the teacher network by using a regression layer. This method enables the student network to learn from the intermediate representations of the teacher network, which are more informative and discriminative than the final outputs.
  - **Attention Transfer (AT)** (Zagoruyko & Komodakis, 2016) is a method that transfers the attention maps of the teacher model to the student model by using a linear combination of spatial and channel-wise attention. This method captures the importance of different regions or channels in the feature maps.
  - **Factor Transfer (FT)** (Kim et al., 2018) is a method that decomposes the teacher’s feature maps into two low-rank factors and transfers them to the student model by using two linear layers. This method reduces the computational complexity and memory consumption of transferring high-dimensional feature maps.
  - **Activation Boundaries (AB)** (Heo et al., 2019) is a method that transfers the decision boundaries of the teacher model to the student model by using a margin-based loss function. This method encourages the student model to learn from the hard examples that are close to the decision boundaries, which are more informative and challenging than the easy examples that are far from the decision boundaries.
  - **Neuron Selectivity Transfer (NST)** (Huang & Wang, 2017) is a method that transfers the neuron selectivity patterns of the teacher model to the student model by using a cosine similarity measure. This method measures how selective each neuron is to different inputs, which reflects the intrinsic knowledge of the teacher model.
- **Relation-based knowledge** is a category of distillation methods that capture the relations between different inputs, outputs, or features of the teacher model and transfer them to the student model. Some examples are:
  - **Similarity-Preserving (SP)** (Tung & Mori, 2019) is a method that preserves the pairwise similarities between the outputs of the teacher model and the student model by using a contrastive loss function. This method transfers the relative similarity information of the teacher model, which is more robust and invariant than the absolute

Table 8: The details of knowledge transfer methods in our framework. For the weight item  $\beta$  of  $\ell_{reg}$ , we typically use the optimal hyperparameter from the original work if it is specified.

|                | Method | Full name                               | Knowledge types                     | Knowledge sources     | $\beta$ |
|----------------|--------|-----------------------------------------|-------------------------------------|-----------------------|---------|
| Logit-based    | KD     | Knowledge Distillation                  | Soft label                          | Final layer           |         |
| Feature-based  | Fitnet | Hints for thin deep nets                | Feature representation              | Hint layer            | 100     |
|                | AT     | Attention Transfer                      | Attention maps                      | Multi-layer group     | 1000    |
|                | FT     | Factor Transfer                         | Paraphraser                         | Multi-layer group     | 500     |
|                | AB     | Activation Boundaries                   | Activation boundaries               | Pre-ReLU              | 0       |
|                | NST    | Neuron Selectivity Transfer             | Neuron selectivity patterns         | Hint layer            | 50      |
| Relation-based | SP     | Similarity-Preserving                   | Similarity matrix                   | Hint layer            | 3000    |
|                | PKT    | Probabilistic Knowledge                 | Similarity probability distribution | Fully-connected layer | 30000   |
|                | VID    | Variational Information Distillation    | Variational information             | Hint layer            | 1       |
|                | RKD    | Relation Knowledge Distillation         | Instance relation                   | Hint layer            | 25      |
|                | CC     | Correlation Congruence                  | Instance relation                   | Hint layer            | 0.02    |
|                | CRD    | Contrastive Representation Distillation | Instance relation                   | Hint layer            | 0.8     |

output values. It also enhances the diversity and quality of the student model’s outputs by minimizing the intra-class variance and maximizing the inter-class variance.

- **Probabilistic Knowledge Transfer (PKT)** (Passalis & Tefas, 2018) is a method that transfers the probabilistic dependencies between different classes from the teacher model to the student model by using probability density function. This method maintains the quadratic mutual information (QMI) of the teacher model, which is more informative and reliable.
- **Variational Information Distillation (VID)** (Ahn et al., 2019) is a method that transfers the mutual information between different inputs and outputs from the teacher model to the student model by using a variational lower bound. This method transfers the input-output dependency information of the teacher model, which is more comprehensive and consistent than the output-only information.
- **Relation Knowledge Distillation (RKD)** (Park et al., 2019) is a method that transfers the geometric relations between different feature embeddings from the teacher model to the student model by using distance-wise and angle-wise loss functions. This method transfers the structural information of the teacher model, which is more discriminative and transferable than the feature values.
- **Correlation Congruence (CC)** (Peng et al., 2019a) is a method that transfers the channel-wise correlations between different feature maps from the teacher model to the student model by using a correlation alignment loss function. This method transfers the statistical information of the teacher model, which is more representative and expressive than the feature values.
- **Contrastive Representation Distillation (CRD)** (Tian et al., 2019) is a method that transfers the instance-level contrastive information from the teacher model to the student model by using an instance discrimination objective. This method transfers the self-supervised information of the teacher model, which is more generalizable and scalable than the supervised information.

### D.3 DATA MANIPULATION TECHNIQUES.

Here is a brief introduction of the data Manipulation Techniques mentioned in our benchmarking:

- **Data Augmentation** is a technique that increases the diversity and size of the training data by applying various transformations or generating new data points. It can improve the generalization and robustness of the model and prevent overfitting. There are two main types of data augmentation: random-based and generation-based.

Random-based Augmentation is a type of data augmentation that applies random transformations to the original data, such as flipping, cropping, rotating, scaling, changing brightness, contrast, or color, adding noise, etc. Some examples of random-based augmentation methods are:

- **ImageNet baseline** is a simple and widely used method that applies random cropping and horizontal flipping to images for image classification tasks.

- **AutoAugment** (Cubuk et al., 2018) is a method that uses reinforcement learning to search for the optimal augmentation policies from a predefined search space for different datasets and tasks.
- **RandAugment** (Cubuk et al., 2020) is a method that simplifies the search process of AutoAugment by using only two hyperparameters: the number and magnitude of the transformations.
- **Gaussian noise** is a method that adds random noise sampled from a Gaussian distribution to the input data, which can improve the model’s resistance to noise and small perturbations.

Generation-based Augmentation is a type of data augmentation that generates new data points by mixing or blending existing data points, such as images or labels:

- **Mixup** (Zhang et al., 2017) is a method that creates new images and labels by taking convex combinations of two images and their corresponding labels.
- **CutMix** (Yun et al., 2019) is a method that creates new images and labels by cutting and pasting patches from two images and their corresponding labels.
- **DomainMix** (Wang et al., 2020) is a method that creates new images by mixing images from different domains, such as natural images, sketches, paintings in PACS, etc.
- **MixStyle** (Zhou et al., 2021) is a method that creates new images by mixing the style features of two images from different domains or datasets, while preserving their content features.
- **Data Pruning** is a technique that reduces the size and complexity of the training data by removing redundant, noisy, or irrelevant data points. It can speed up the training process and improve the model performance. Some examples of data pruning methods are:
  - **Random Prune** is a simple method that randomly selects a subset of the training data to train the model. It can reduce the training time and sometimes achieve better results than using the full dataset.
  - **EL2N** (Paul et al., 2021) is a method that assigns an importance score to each data point based on the output of model prediction, and prunes the data points with low scores.
  - **GraNd** (Paul et al., 2021) is a method that assigns an importance score to each data point based on its gradient norm difference with respect to the average gradient norm over all data points, and prunes the data points with low scores.

## E MORE RESULTS ON OUR FRAMEWORK

Table 9: PACS: Knowledge transfer methods

| Alg    | Art              | Cartoon          | Photo            | Sketch           |
|--------|------------------|------------------|------------------|------------------|
| KD     | 81.49 $\pm$ 0.64 | 78.14 $\pm$ 0.35 | 95.43 $\pm$ 0.09 | 69.42 $\pm$ 2.08 |
| Fitnet | 70.52 $\pm$ 0.54 | 73.68 $\pm$ 0.86 | 89.1 $\pm$ 0.31  | 59.5 $\pm$ 2.97  |
| AT     | 80.99 $\pm$ 0.79 | 77.13 $\pm$ 0.63 | 95.13 $\pm$ 0.14 | 69.62 $\pm$ 2.21 |
| FT     | 77.98 $\pm$ 0.95 | 77.83 $\pm$ 0.89 | 92.39 $\pm$ 0.94 | 69.38 $\pm$ 1.63 |
| AB     | 74.82 $\pm$ 1.51 | 71.48 $\pm$ 0.91 | 90.32 $\pm$ 0.83 | 69.42 $\pm$ 0.99 |
| SP     | 81.25 $\pm$ 0.38 | 79.07 $\pm$ 0.26 | 95.11 $\pm$ 0.17 | 72.77 $\pm$ 1.99 |
| NST    | 81.44 $\pm$ 0.49 | 77.93 $\pm$ 0.86 | 92.87 $\pm$ 0.59 | 74.1 $\pm$ 1.08  |
| PKT    | 81.71 $\pm$ 0.84 | 77.39 $\pm$ 0.83 | 95.37 $\pm$ 0.6  | 71.4 $\pm$ 1.99  |
| VID    | 80.94 $\pm$ 0.95 | 77.09 $\pm$ 0.72 | 95.41 $\pm$ 0.39 | 68.36 $\pm$ 2.74 |
| RKD    | 71.31 $\pm$ 0.71 | 74.18 $\pm$ 0.61 | 87.7 $\pm$ 0.4   | 71.26 $\pm$ 1.7  |
| CC     | 81.09 $\pm$ 1.19 | 77.49 $\pm$ 1.1  | 95.27 $\pm$ 0.06 | 67.82 $\pm$ 4.12 |
| CRD    | 78.09 $\pm$ 0.57 | 75.23 $\pm$ 0.6  | 92.54 $\pm$ 0.48 | 72.8 $\pm$ 0.95  |

Table 10: OfficeHome: Knowledge transfer methods

| Alg    | Art              | Cartoon          | Photo            | Sketch           |
|--------|------------------|------------------|------------------|------------------|
| KD     | 60.83 $\pm$ 0.44 | 50.45 $\pm$ 0.61 | 74.51 $\pm$ 0.28 | 75.95 $\pm$ 0.72 |
| Fitnet | 53.14 $\pm$ 0.42 | 48.67 $\pm$ 1.17 | 70.03 $\pm$ 0.94 | 70.21 $\pm$ 0.82 |
| AT     | 59.65 $\pm$ 0.37 | 51.25 $\pm$ 0.59 | 75.08 $\pm$ 0.44 | 76.08 $\pm$ 0.98 |
| FT     | 55.31 $\pm$ 0.67 | 50.76 $\pm$ 1.37 | 71.64 $\pm$ 0.29 | 74.13 $\pm$ 0.88 |
| AB     | 46.38 $\pm$ 4.85 | 44.25 $\pm$ 2.18 | 66.05 $\pm$ 3.9  | 62.64 $\pm$ 2.2  |
| SP     | 60.94 $\pm$ 0.43 | 50.45 $\pm$ 0.24 | 74.81 $\pm$ 0.62 | 76.4 $\pm$ 0.44  |
| NST    | 58.88 $\pm$ 0.29 | 52.8 $\pm$ 0.56  | 73.08 $\pm$ 0.28 | 76.04 $\pm$ 0.34 |
| PKT    | 61.16 $\pm$ 0.52 | 51.16 $\pm$ 0.26 | 74.03 $\pm$ 0.2  | 76.51 $\pm$ 0.59 |
| VID    | 60.93 $\pm$ 0.69 | 50.32 $\pm$ 0.17 | 73.97 $\pm$ 0.18 | 76.46 $\pm$ 0.46 |
| RKD    | 41.11 $\pm$ 0.58 | 39.47 $\pm$ 1.58 | 57.57 $\pm$ 3.21 | 46.33 $\pm$ 1.9  |
| CC     | 60.38 $\pm$ 0.83 | 51.06 $\pm$ 0.12 | 73.91 $\pm$ 0.24 | 75.87 $\pm$ 0.49 |
| CRD    | 58.78 $\pm$ 0.93 | 49.29 $\pm$ 1.07 | 72.58 $\pm$ 0.32 | 74.99 $\pm$ 0.38 |

Table 11: DomainNet: Knowledge transfer methods

| Alg    | Clipart          | Infograph        | Painting         | quickdraw        | Real             | Sketch           |
|--------|------------------|------------------|------------------|------------------|------------------|------------------|
| KD     | 53.54 $\pm$ 0.11 | 18.08 $\pm$ 0.09 | 43.82 $\pm$ 0.27 | 10.87 $\pm$ 0.18 | 56.34 $\pm$ 0.08 | 42.34 $\pm$ 0.03 |
| Fitnet | 35.22 $\pm$ 1.42 | 11.69 $\pm$ 1.16 | 25.16 $\pm$ 7.26 | 7.89 $\pm$ 0.75  | 34.78 $\pm$ 3.15 | 28.42 $\pm$ 2.14 |
| AT     | 53.55 $\pm$ 0.2  | 17.81 $\pm$ 0.12 | 43.63 $\pm$ 0.1  | 11.48 $\pm$ 0.32 | 55.78 $\pm$ 0.28 | 42.11 $\pm$ 0.37 |
| FT     | 51.5 $\pm$ 0.32  | 16.96 $\pm$ 0.08 | 41.9 $\pm$ 0.13  | 10.91 $\pm$ 0.27 | 52.84 $\pm$ 0.14 | 40.42 $\pm$ 0.07 |
| AB     | 44.46 $\pm$ 2.67 | 13.43 $\pm$ 0.69 | 34.32 $\pm$ 0.89 | 11.32 $\pm$ 0.91 | 41.9 $\pm$ 3.31  | 34.47 $\pm$ 1.17 |
| SP     | 54.5 $\pm$ 0.14  | 18.17 $\pm$ 0.13 | 44.4 $\pm$ 0.25  | 11.35 $\pm$ 0.19 | 57.04 $\pm$ 0.09 | 42.86 $\pm$ 0.27 |
| NST    | 49.65 $\pm$ 0.36 | 16.47 $\pm$ 0.22 | 40.45 $\pm$ 0.41 | 11.71 $\pm$ 0.25 | 50.35 $\pm$ 0.65 | 39.37 $\pm$ 0.22 |
| PKT    | 54.21 $\pm$ 0.11 | 18.44 $\pm$ 0.22 | 44.45 $\pm$ 0.19 | 10.97 $\pm$ 0.1  | 56.87 $\pm$ 0.17 | 42.62 $\pm$ 0.19 |
| VID    | 53.58 $\pm$ 0.17 | 18.3 $\pm$ 0.24  | 43.78 $\pm$ 0.25 | 10.99 $\pm$ 0.27 | 56.31 $\pm$ 0.15 | 42.33 $\pm$ 0.2  |
| RKD    | 51.37 $\pm$ 0.24 | 16.68 $\pm$ 0.11 | 40.84 $\pm$ 0.42 | 11.55 $\pm$ 0.33 | 51.86 $\pm$ 0.31 | 39.7 $\pm$ 0.5   |
| CC     | 52.81 $\pm$ 0.06 | 17.85 $\pm$ 0.11 | 43.55 $\pm$ 0.11 | 11.15 $\pm$ 0.22 | 55.43 $\pm$ 0.12 | 42.06 $\pm$ 0.18 |
| CRD    | 54.08 $\pm$ 0.09 | 18.2 $\pm$ 0.04  | 43.99 $\pm$ 0.23 | 11.42 $\pm$ 0.25 | 56.41 $\pm$ 0.07 | 42.4 $\pm$ 0.19  |

Table 12: PACS: Data manipulation methods

| Alg        | Art              | Cartoon          | Photo            | Sketch           |
|------------|------------------|------------------|------------------|------------------|
| Identity   | 81.49 $\pm$ 0.64 | 78.14 $\pm$ 0.35 | 95.43 $\pm$ 0.09 | 69.42 $\pm$ 2.08 |
| ImageNet   | 82.65 $\pm$ 1.26 | 79.14 $\pm$ 0.3  | 94.85 $\pm$ 0.32 | 76.34 $\pm$ 1.77 |
| AutoAug    | 84.23 $\pm$ 0.74 | 78.53 $\pm$ 0.41 | 95.49 $\pm$ 0.58 | 76.0 $\pm$ 1.78  |
| RandAug    | 82.67 $\pm$ 0.52 | 79.07 $\pm$ 0.39 | 95.31 $\pm$ 0.39 | 74.97 $\pm$ 2.39 |
| Mixup      | 80.57 $\pm$ 1.52 | 75.82 $\pm$ 1.78 | 93.49 $\pm$ 0.56 | 70.38 $\pm$ 2.44 |
| CutMix     | 79.95 $\pm$ 0.71 | 75.07 $\pm$ 1.15 | 92.73 $\pm$ 0.19 | 67.04 $\pm$ 0.34 |
| DomainMix  | 80.57 $\pm$ 1.09 | 75.94 $\pm$ 0.73 | 94.93 $\pm$ 0.35 | 66.99 $\pm$ 2.12 |
| Mixstyle   | 81.04 $\pm$ 0.62 | 77.26 $\pm$ 0.87 | 95.47 $\pm$ 0.07 | 68.74 $\pm$ 1.8  |
| Prune_rand | 80.53 $\pm$ 1.17 | 76.52 $\pm$ 0.83 | 95.15 $\pm$ 0.18 | 65.51 $\pm$ 0.93 |
| EL2N       | 80.68 $\pm$ 0.66 | 72.85 $\pm$ 1.62 | 95.45 $\pm$ 0.47 | 67.12 $\pm$ 4.97 |
| GraNd      | 79.15 $\pm$ 1.59 | 74.76 $\pm$ 0.66 | 95.09 $\pm$ 0.33 | 67.21 $\pm$ 2.13 |
| Noise      | 71.71 $\pm$ 0.59 | 67.62 $\pm$ 1.24 | 89.06 $\pm$ 0.74 | 38.73 $\pm$ 9.98 |

Table 13: OfficeHome: Data manipulation methods

| Alg        | Art              | Clipart          | Product          | RealWorld        |
|------------|------------------|------------------|------------------|------------------|
| Identity   | 60.83 $\pm$ 0.44 | 50.45 $\pm$ 0.61 | 74.51 $\pm$ 0.28 | 75.95 $\pm$ 0.72 |
| ImageNet   | 62.34 $\pm$ 0.23 | 53.64 $\pm$ 0.64 | 75.44 $\pm$ 0.32 | 77.81 $\pm$ 0.2  |
| AutoAug    | 61.78 $\pm$ 0.29 | 54.88 $\pm$ 0.99 | 75.33 $\pm$ 0.1  | 77.78 $\pm$ 0.48 |
| RandAug    | 61.53 $\pm$ 0.13 | 54.22 $\pm$ 0.93 | 75.72 $\pm$ 0.13 | 77.58 $\pm$ 0.7  |
| Mixup      | 60.05 $\pm$ 0.54 | 52.54 $\pm$ 0.01 | 74.02 $\pm$ 0.76 | 76.35 $\pm$ 0.2  |
| CutMix     | 59.73 $\pm$ 0.59 | 49.63 $\pm$ 0.55 | 74.98 $\pm$ 0.1  | 75.95 $\pm$ 0.47 |
| DomainMix  | 60.32 $\pm$ 0.64 | 49.39 $\pm$ 0.26 | 74.66 $\pm$ 0.66 | 77.36 $\pm$ 0.36 |
| Mixstyle   | 60.79 $\pm$ 0.87 | 51.68 $\pm$ 0.71 | 74.31 $\pm$ 0.31 | 76.83 $\pm$ 0.42 |
| Prune_rand | 59.39 $\pm$ 0.55 | 50.51 $\pm$ 0.73 | 73.04 $\pm$ 0.31 | 76.19 $\pm$ 0.71 |
| EL2N       | 59.52 $\pm$ 0.63 | 49.43 $\pm$ 0.48 | 72.72 $\pm$ 0.43 | 75.13 $\pm$ 0.59 |
| GraNd      | 58.44 $\pm$ 0.25 | 49.72 $\pm$ 0.46 | 72.91 $\pm$ 0.6  | 75.48 $\pm$ 0.23 |
| Noise      | 43.91 $\pm$ 2.36 | 40.09 $\pm$ 1.0  | 63.5 $\pm$ 0.95  | 63.46 $\pm$ 2.76 |

Table 14: DomainNet: Data manipulation methods

| Alg        | Clipart          | Infograph        | Painting         | quickdraw        | Real             | Sketch           |
|------------|------------------|------------------|------------------|------------------|------------------|------------------|
| Identity   | 53.54 $\pm$ 0.11 | 18.08 $\pm$ 0.09 | 43.82 $\pm$ 0.27 | 10.87 $\pm$ 0.18 | 56.34 $\pm$ 0.08 | 42.34 $\pm$ 0.03 |
| ImageNet   | 52.09 $\pm$ 0.1  | 16.1 $\pm$ 0.09  | 42.84 $\pm$ 0.39 | 11.63 $\pm$ 0.03 | 54.07 $\pm$ 0.05 | 44.06 $\pm$ 0.18 |
| AutoAug    | 51.92 $\pm$ 0.1  | 16.57 $\pm$ 0.16 | 43.42 $\pm$ 0.1  | 11.45 $\pm$ 0.23 | 53.71 $\pm$ 0.07 | 43.29 $\pm$ 0.24 |
| RandAug    | 52.95 $\pm$ 0.25 | 16.9 $\pm$ 0.1   | 43.81 $\pm$ 0.25 | 11.64 $\pm$ 0.26 | 54.93 $\pm$ 0.2  | 42.43 $\pm$ 0.27 |
| Mixup      | 56.46 $\pm$ 0.33 | 19.23 $\pm$ 0.17 | 46.31 $\pm$ 0.34 | 12.51 $\pm$ 0.13 | 57.2 $\pm$ 0.18  | 44.65 $\pm$ 0.25 |
| CutMix     | 54.18 $\pm$ 0.34 | 18.47 $\pm$ 0.09 | 44.7 $\pm$ 0.21  | 11.67 $\pm$ 0.52 | 56.21 $\pm$ 0.2  | 42.76 $\pm$ 0.23 |
| DomainMix  | 49.18 $\pm$ 0.52 | 16.63 $\pm$ 0.22 | 41.72 $\pm$ 0.34 | 9.6 $\pm$ 0.39   | 52.0 $\pm$ 0.17  | 39.94 $\pm$ 0.23 |
| Mixstyle   | 53.54 $\pm$ 0.11 | 18.08 $\pm$ 0.09 | 43.82 $\pm$ 0.27 | 10.87 $\pm$ 0.18 | 56.34 $\pm$ 0.08 | 42.34 $\pm$ 0.03 |
| Prune_rand | 52.97 $\pm$ 0.07 | 17.84 $\pm$ 0.08 | 43.59 $\pm$ 0.18 | 10.48 $\pm$ 0.17 | 55.99 $\pm$ 0.04 | 41.65 $\pm$ 0.25 |
| EL2N       | 51.78 $\pm$ 0.47 | 17.43 $\pm$ 0.16 | 42.31 $\pm$ 0.15 | 10.47 $\pm$ 0.11 | 54.38 $\pm$ 0.39 | 41.04 $\pm$ 0.16 |
| GraNd      | 53.0 $\pm$ 0.21  | 17.51 $\pm$ 0.36 | 42.85 $\pm$ 0.06 | 10.8 $\pm$ 0.33  | 55.1 $\pm$ 0.19  | 41.65 $\pm$ 0.18 |
| Noise      | 26.6 $\pm$ 0.44  | 8.53 $\pm$ 0.17  | 17.65 $\pm$ 0.77 | 7.16 $\pm$ 0.65  | 24.51 $\pm$ 0.39 | 28.6 $\pm$ 0.45  |
